# Supplementary material for: Transcriptomic Signature of Leishmania Infected Mice Macrophages: A Metabolic Point of View
Source: PubMed Central journal article supplement (PMC3424254; doi:10.1371/journal.pntd.0001763), 2012-08-21
Supplement: pntd.0001763.s001.pdf [file pntd.0001763.s001.pdf]

Table S1 : Canonical pathways identified by Inguenuity Pathway Analysis™ software as significantly altered in *L. major* infected BALB/c macrophages

| © 2000-2010 Ingenuity Systems, Inc. All rights reserved. |              |               |          |                                                                                       |
|----------------------------------------------------------|--------------|---------------|----------|---------------------------------------------------------------------------------------|
| Inguenuity Canonical Pathways                            | AnalysisName | -log(p-value) | Ratio    | Molecules                                                                             |
| Glycolysis/Gluconeogenesis                               | 3h           | 5.4E00        | 7.04E-02 | HK1, HK2, ALDH3A2, PGM1, ENO2, HK3, PFKP, PFKL, ACSL1, LDHA                           |
| Glycolysis/Gluconeogenesis                               | 6h           | 8.3E00        | 9.86E-02 | PKM2, PGM1, ENO2, PFKP, PFKL, TP11, HK1, HK2, ALDH3A2, ALDOA, HK3, LDHA, PTGR1, ACSL1 |
| Glycolysis/Gluconeogenesis                               | 12h          | 9.71E00       | 9.86E-02 | PGM1, ENO2, PFKP, PFKL, TP11, HK1, GPI, HK2, PGM5, ALDOA, HK3, ACSL1, LDHA, ALDOC     |
| Glycolysis/Gluconeogenesis                               | 24h          | 1.75E00       | 1.41E-02 | ENO2, HK3                                                                             |
| Galactose Metabolism                                     | 3h           | 3.73E00       | 5.22E-02 | HK1, HK2, PGM1, HK3, PFKP, PFKL                                                       |
| Galactose Metabolism                                     | 6h           | 5.2E00        | 6.96E-02 | HK1, GLA, HK2, AKR1B10, PGM1, HK3, PFKP, PFKL                                         |
| Galactose Metabolism                                     | 12h          | 4.93E00       | 6.09E-02 | HK1, HK2, PGM5, PGM1, HK3, PFKP, PFKL                                                 |
| Galactose Metabolism                                     | 24h          | 9.82E-01      | 8.7E-03  | HK3                                                                                   |
| Fructose and Mannose Metabolism                          | 3h           | 3.38E00       | 4.14E-02 | PFKFB3, HK1, HK2, HK3, PFKP, PFKL                                                     |
| Fructose and Mannose Metabolism                          | 6h           | 5.68E00       | 6.21E-02 | PFKFB3, HK1, HK2, AKR1B10, ALDOA, HK3, PFKP, PFKL, TP11                               |
| Fructose and Mannose Metabolism                          | 12h          | 6.59E00       | 6.21E-02 | PFKFB3, HK1, HK2, ALDOA, HK3, PFKP, PFKL, TP11, ALDOC                                 |
| Fructose and Mannose Metabolism                          | 24h          | 2.93E-01      | 9.6E-03  | HK3                                                                                   |
| Arginine and Proline Metabolism                          | 3h           | 2.9E00        | 3.28E-02 | P4HA1, RARS, ALDH3A2, SMOX, GATM, P4HA2                                               |
| Arginine and Proline Metabolism                          | 6h           | 2.23E00       | 3.28E-02 | P4HA1, ALDH3A2, SMOX, NOS2, GATM, P4HA2                                               |
| Arginine and Proline Metabolism                          | 12h          | 3.55E00       | 3.83E-02 | P4HA1, P4HB, GOT1, SMOX, NOS2, GATM, P4HA2                                            |
| Arginine and Proline Metabolism                          | 24h          | 7.86E-01      | 5.46E-03 | P4HA2                                                                                 |
| Glutathione Metabolism                                   | 3h           | 2.47E00       | 5.1E-02  | GSR, LNPEP, GCLC, GCLM, IDH1                                                          |
| Glutathione Metabolism                                   | 6h           | 4.6E00        | 8.16E-02 | GSR, PGD, GSTM5, GCLC, GCLM, GLRX, RNPEP, IDH1                                        |
| Glutathione Metabolism                                   | 12h          | 4.39E00       | 7.14E-02 | GSR, GSTM5, HPGDS, GCLM, GLRX, RNPEP, IDH1                                            |
| Glutathione Metabolism                                   | 24h          | 9.07E-01      | 1.02E-02 | GSTM5                                                                                 |
| Glutamate Metabolism                                     | 3h           | 2.34E00       | 5.13E-02 | GSR, GLUL, GCLC, GCLM                                                                 |
| Glutamate Metabolism                                     | 6h           | 2.08E00       | 5.13E-02 | GSR, GLUL, GCLC, GCLM                                                                 |
| Glutamate Metabolism                                     | 12h          | 3.42E00       | 6.41E-02 | GSR, GFPT1, GLUL, GOT1, GCLM                                                          |
| Starch and Sucrose Metabolism                            | 3h           | 2.21E00       | 3.05E-02 | HK1, GYS1, HK2, PGM1, GBE1, HK3                                                       |
| Starch and Sucrose Metabolism                            | 6h           | 2.58E00       | 3.55E-02 | HK1, UGDH, GYS1, HK2, PGM1, GBE1, HK3                                                 |
| Starch and Sucrose Metabolism                            | 12h          | 4.93E00       | 4.57E-02 | HK1, GPI, UGDH, GYS1, HK2, PGM5, PGM1, GBE1, HK3                                      |
| Starch and Sucrose Metabolism                            | 24h          | 2E00          | 1.02E-02 | GBE1, HK3                                                                             |
| Nicotinate and Nicotinamide Metabolism                   | 3h           | 1.96E00       | 4.41E-02 | PIM1, CDK6, MAPK6, NAMPT, MAP2K3, MAP2K1                                              |
| Nicotinate and Nicotinamide Metabolism                   | 6h           | 7.39E-01      | 2.94E-02 | PAK1, CDK6, NADK (includes EG:65220), MAP2K1                                          |
| Nicotinate and Nicotinamide Metabolism                   | 12h          | 2.11E00       | 4.41E-02 | CDK6, MAPK6, NAMPT, NADK (includes EG:65220), MAP2K1, BST1                            |
| Methionine Metabolism                                    | 3h           | 1.81E00       | 3.75E-02 | DNMT3A, MTR, MAT2A                                                                    |
| Methionine Metabolism                                    | 6h           | 3.28E-01      | 1.25E-02 | MTR                                                                                   |
| Methionine Metabolism                                    | 12h          | 4.1E-01       | 1.25E-02 | MTR                                                                                   |
| Selenoamino Acid Metabolism                              | 3h           | 1.62E00       | 3.9E-02  | SEPHS2, METTL6, MAT2A                                                                 |
| Selenoamino Acid Metabolism                              | 6h           | 2.78E-01      | 1.3E-02  | SEPHS2                                                                                |
| Selenoamino Acid Metabolism                              | 12h          | 3.56E-01      | 1.3E-02  | SEPHS2                                                                                |
| Pentose Phosphate Pathway                                | 3h           | 1.56E00       | 3.37E-02 | PGM1, PFKP, PFKL                                                                      |
| Pentose Phosphate Pathway                                | 6h           | 2.99E00       | 5.62E-02 | PGD, PGM1, ALDOA, PFKP, PFKL                                                          |
| Pentose Phosphate Pathway                                | 12h          | 5.69E00       | 7.87E-02 | GPI, PGM5, PGM1, ALDOA, PFKP, PFKL, ALDOC                                             |
| Inositol Phosphate Metabolism                            | 3h           | 1.45E00       | 3.41E-02 | PIM1, CDK6, MAPK6, MAP2K3, PIK3CD, MAP2K1                                             |
| Inositol Phosphate Metabolism                            | 6h           | 3.18E00       | 5.68E-02 | PLCB2, PAK1, PLCG2, PIKFYVE, CDK6, PIK3CD, INPP5K, PIP4K2A, MAP2K1, INPP5D            |
| Inositol Phosphate Metabolism                            | 12h          | 1.12E00       | 2.84E-02 | CDK6, MAPK6, IMPA2, PIK3CB, MAP2K1                                                    |
| One Carbon Pool by Folate                                | 3h           | 1.35E00       | 5.13E-02 | MTR, MTHFD1L                                                                          |
| One Carbon Pool by Folate                                | 6h           | 2.15E00       | 7.69E-02 | EHD4, MTR, MTHFD1L                                                                    |
| One Carbon Pool by Folate                                | 12h          | 1.41E00       | 5.13E-02 | MTR, MTHFD1L                                                                          |
| Inositol Metabolism                                      | 3h           | 1.18E00       | 4.08E-02 | POR, HMOX1, ERO1L, DEGS1                                                              |
| Inositol Metabolism                                      | 6h           | 2.01E00       | 6.12E-02 | HMOX1, CXORF21, ALDOA, ERO1L, TP11, FADS1                                             |
| Inositol Metabolism                                      | 12h          | 3.27E00       | 7.14E-02 | HMOX1, ALDOA, ERO1L, TP11, FADS1, FZD7, ALDOC                                         |
| Histidine Metabolism                                     | 3h           | 1.15E00       | 2.5E-02  | ALDH3A2, METTL6, SMOX                                                                 |
| Histidine Metabolism                                     | 6h           | 4.98E-01      | 1.67E-02 | ALDH3A2, SMOX                                                                         |
| Histidine Metabolism                                     | 12h          | 2.27E-01      | 8.33E-03 | SMOX                                                                                  |
| N-Glycan Degradation                                     | 3h           | 1.01E00       | 6.25E-02 | MAN2A2, ENGASE                                                                        |
| N-Glycan Degradation                                     | 6h           | 2.48E00       | 1.25E-01 | MAN1C1, MAN2B1, MAN2A2, ENGASE                                                        |
| N-Glycan Degradation                                     | 12h          | 2.87E00       | 1.25E-01 | MAN1C1, MAN2B1, MAN2A2, ENGASE                                                        |
| O-Glycan Biosynthesis                                    | 3h           | 9.62E-01      | 4.28E-02 | GCNT1, ST3GAL1                                                                        |
| O-Glycan Biosynthesis                                    | 6h           | 3.06E-01      | 2.13E-02 | GCNT1                                                                                 |
| Propanoate Metabolism                                    | 3h           | 9.52E-01      | 2.31E-02 | ALDH3A2, ACSL1, LDHA                                                                  |
| Propanoate Metabolism                                    | 6h           | 7.9E-01       | 2.31E-02 | ALDH3A2, ACSL1, LDHA                                                                  |
| Propanoate Metabolism                                    | 12h          | 5.31E-01      | 1.54E-02 | ACSL1, LDHA                                                                           |
| Aminosugars Metabolism                                   | 3h           | 9.07E-01      | 2.46E-02 | HK1, HK2, HK3                                                                         |
| Aminosugars Metabolism                                   | 6h           | 7.48E-01      | 2.46E-02 | HK1, HK2, HK3                                                                         |
| Aminosugars Metabolism                                   | 12h          | 3.87E00       | 5.74E-02 | HK1, GFPT1, HK2, PDE3B, PDE1B, CYB5R3, HK3                                            |
| Aminosugars Metabolism                                   | 24h          | 8.32E-01      | 8.2E-03  | HK3                                                                                   |
| Lysine Degradation                                       | 3h           | 8.84E-01      | 2.14E-02 | CNDP2, ALDH3A2, DOT1L, MMP13, CASP4                                                   |
| Lysine Degradation                                       | 6h           | 4.04E-01      | 1.71E-02 | CNDP2, ALDH3A2, DOT1L, MMP13                                                          |
| Lysine Degradation                                       | 12h          | 3.45E-01      | 1.28E-02 | PLD2, DOT1L, MMP13                                                                    |
| Lysine Degradation                                       | 24h          | 5.31E-01      | 4.27E-03 | DOT1L                                                                                 |
| Pyruvate Metabolism                                      | 3h           | 8.25E-01      | 2.01E-02 | ALDH3A2, ACSL1, LDHA                                                                  |
| Pyruvate Metabolism                                      | 6h           | 2.29E00       | 4.03E-02 | GRHPR, PKM2, ALDH3A2, AKR1B10, ACSL1, LDHA                                            |
| Pyruvate Metabolism                                      | 12h          | 8.96E-01      | 2.01E-02 | HAGH, ACSL1, LDHA                                                                     |
| Glycosphingolipid Biosynthesis - Lactoseries             | 3h           | 8.03E-01      | 3.7E-02  | ST3GAL1                                                                               |
| Bile Acid Biosynthesis                                   | 3h           | 7.61E-01      | 2E-02    | CYP27A1, ALDH3A2                                                                      |
| Bile Acid Biosynthesis                                   | 6h           | 1.22E00       | 3E-02    | CYP27A1, ALDH3A2, PTGR1                                                               |
| Bile Acid Biosynthesis                                   | 12h          | 2.96E-01      | 1E-02    | CYP27A1                                                                               |
| Nitrogen Metabolism                                      | 3h           | 7.28E-01      | 1.5E-02  | GLUL, ASNS                                                                            |
| Nitrogen Metabolism                                      | 6h           | 6.15E-01      | 1.5E-02  | GLUL, ASNS                                                                            |
| Nitrogen Metabolism                                      | 12h          | 2.82E-01      | 7.52E-03 | GLUL                                                                                  |
| Tryptophan Metabolism                                    | 3h           | 7.03E-01      | 1.57E-02 | ALDH3A2, METTL6, SMOX, PTGS2                                                          |
| Tryptophan Metabolism                                    | 6h           | 2.86E-01      | 1.18E-02 | ALDH3A2, SMOX, PTGS2                                                                  |
| Tryptophan Metabolism                                    | 12h          | 4.46E-01      | 1.18E-02 | CAT, SMOX, PTGS2                                                                      |
| Keratan Sulfate Biosynthesis                             | 3h           | 6.82E-01      | 3.64E-02 | ST3GAL1, B4GALT5                                                                      |
| Keratan Sulfate Biosynthesis                             | 12h          | 2.62E-01      | 1.82E-02 | WDFY3                                                                                 |
| Keratan Sulfate Biosynthesis                             | 24h          | 9.82E-01      | 1.82E-02 | WDFY3                                                                                 |
| Glycerolipid Metabolism                                  | 3h           | 6.28E-01      | 1.92E-02 | AGPAT5, ALDH3A2, PPAP2B                                                               |
| Glycerolipid Metabolism                                  | 6h           | 1.82E00       | 3.85E-02 | GLA, ALDH3A2, PPAP2B, AKR1B10, PNPLA2, PTGR1                                          |
| Glycerolipid Metabolism                                  | 12h          | 3.36E-01      | 1.28E-02 | PPAP2B, APOC2                                                                         |
| Folate Biosynthesis                                      | 3h           | 6.05E-01      | 1.25E-02 | GCH1                                                                                  |
| Folate Biosynthesis                                      | 6h           | 5.4E-01       | 1.25E-02 | GCH1                                                                                  |
| N-Glycan Biosynthesis                                    | 3h           | 6.03E-01      | 2.15E-02 | MAN2A2, B4GALT5                                                                       |
| N-Glycan Biosynthesis                                    | 6h           | 9.74E-01      | 3.23E-02 | MAN1C1, WDFY3, MAN2A2                                                                 |
| N-Glycan Biosynthesis                                    | 12h          | 1.23E00       | 3.23E-02 | MAN1C1, WDFY3, MAN2A2                                                                 |
| N-Glycan Biosynthesis                                    | 24h          | 9.31E-01      | 1.08E-02 | WDFY3                                                                                 |
| Glyoxylate and Dicarboxylate Metabolism                  | 3h           | 5.59E-01      | 8.55E-03 | MTHFD1L                                                                               |
| Glyoxylate and Dicarboxylate Metabolism                  | 6h           | 1.28E00       | 1.71E-02 | GRHPR, MTHFD1L                                                                        |
| Glyoxylate and Dicarboxylate Metabolism                  | 12h          | 5.87E-01      | 8.55E-03 | MTHFD1L                                                                               |
| Phenylalanine, Tyrosine and Tryptophan Biosynthesis      | 3h           | 5.38E-01      | 1.49E-02 | ENO2                                                                                  |
| Phenylalanine, Tyrosine and Tryptophan Biosynthesis      | 6h           | 4.75E-01      | 1.49E-02 | ENO2                                                                                  |
| Phenylalanine, Tyrosine and Tryptophan Biosynthesis      | 12h          | 1.41E00       | 2.99E-02 | ENO2, GOT1                                                                            |
| Phenylalanine, Tyrosine and Tryptophan Biosynthesis      | 24h          | 1.37E00       | 1.49E-02 | ENO2                                                                                  |
| Tyrosine Metabolism                                      | 3h           | 4.68E-01      | 9.9E-03  | METTL6, SMOX                                                                          |
| Tyrosine Metabolism                                      | 6h           | 3.75E-01      | 9.9E-03  | SMOX, PTGR1                                                                           |
| Tyrosine Metabolism                                      | 12h          | 5.13E-01      | 9.9E-03  | GOT1, SMOX                                                                            |
| Glycine, Serine and Threonine Metabolism                 | 3h           | 4.43E-01      | 1.3E-02  | SMOX, GATM                                                                            |
| Glycine, Serine and Threonine Metabolism                 | 6h           | 1.77E00       | 3.3E-02  | GRHPR, PLCB2, PLCG2, SMOX, GATM                                                       |
| Glycine, Serine and Threonine Metabolism                 | 12h          | 9.51E-01      | 2E-02    | GOT1, SMOX, GATM                                                                      |
| Glycosphingolipid Biosynthesis - Globoseries             | 3h           | 4.22E-01      | 2.17E-02 | ST3GAL1                                                                               |
| Glycosphingolipid Biosynthesis - Globoseries             | 6h           | 3.64E-01      | 2.17E-02 | GLA                                                                                   |
| Ascorbate and Aldarate Metabolism                        | 3h           | 4.22E-01      | 1.16E-02 | ALDH3A2                                                                               |
| Ascorbate and Aldarate Metabolism                        | 6h           | 3.64E-01      | 1.16E-02 | ALDH3A2                                                                               |
| Glycerophospholipid Metabolism                           | 3h           | 4.04E-01      | 1.55E-02 | HMOX1, AGPAT5, PPAP2B                                                                 |
| Glycerophospholipid Metabolism                           | 6h           | 1.27E00       | 3.11E-02 | HMOX1, PLA2G4A, PLCB2, LPCAT2, PLCG2, PPAP2B                                          |
| Glycerophospholipid Metabolism                           | 12h          | 1.23E00       | 2.59E-02 | HMOX1, PLA2G4A, LPCAT2, PPAP2B, GOT1                                                  |
| Glycerophospholipid Metabolism                           | 24h          | 5.95E-01      | 1.54E-02 | LPCAT2                                                                                |
| Aminophosphonate Metabolism                              | 3h           | 3.84E-01      | 1.54E-02 | METTL6                                                                                |
| Glycosphingolipid Biosynthesis - Ganglioseries           | 3h           | 3.73E-01      | 1.54E-02 | ST3GAL1                                                                               |
| Citrate Cycle                                            | 3h           | 3.62E-01      | 1.69E-02 | IDH1                                                                                  |
| Citrate Cycle                                            | 6h           | 3.06E-01      | 1.69E-02 | IDH1                                                                                  |
| Citrate Cycle                                            | 12h          | 1.02E00       | 3.39E-02 | IDH3G, IDH1                                                                           |
| Biosynthesis of Steroids                                 | 3h           | 3.62E-01      | 7.81E-03 | SQLE                                                                                  |
| Biosynthesis of Steroids                                 | 12h          | 3.87E-01      | 7.81E-03 | EBP                                                                                   |
| Urea Cycle and Metabolism of Amino Groups                | 3h           | 3.51E-01      | 1.25E-02 | GATM                                                                                  |
| Urea Cycle and Metabolism of Amino Groups                | 6h           | 2.97E-01      | 1.25E-02 | GATM                                                                                  |
| Urea Cycle and Metabolism of Amino Groups                | 12h          | 9.94E-01      | 2.5E-02  | CAT, GATM                                                                             |
| Phospholipid Degradation                                 | 3h           | 3.38E-01      | 1.89E-02 | HMOX1, PPAP2B                                                                         |
| Phospholipid Degradation                                 | 6h           | 1.43E00       | 4.72E-02 | HMOX1, PLA2G4A, PLCB2, PLCG2, PPAP2B                                                  |
| Phospholipid Degradation                                 | 12h          | 7.64E-01      | 2.83E-02 | HMOX1, PLA2G4A, PPAP2B                                                                |
| Phenylalanine Metabolism                                 | 3h           | 3.31E-01      | 9.17E-03 | SMOX                                                                                  |
| Phenylalanine Metabolism                                 | 6h           | 7.73E-01      | 1.83E-02 | PRDX1, SMOX                                                                           |
| Phenylalanine Metabolism                                 | 12h          | 9.49E-01      | 1.83E-02 | GOT1, SMOX                                                                            |
| Glycosaminoglycan Degradation                            | 3h           | 3.22E-01      | 2.78E-02 | SGSH, HYAL1                                                                           |
| Glycosaminoglycan Degradation                            | 6h           | 7.53E-01      | 4.17E-02 | SGSH, HYAL1, SULF2                                                                    |
| Aminoacyl-tRNA Biosynthesis                              | 3h           | 2.96E-01      | 1.2E-02  | RARS                                                                                  |
| Alanine and Aspartate Metabolism                         | 3h           | 2.73E-01      | 1.14E-02 | ASNS                                                                                  |
| Alanine and Aspartate Metabolism                         | 6h           | 2.24E-01      | 1.14E-02 | ASNS                                                                                  |
| Alanine and Aspartate Metabolism                         | 12h          | 8.13E-01      | 2.27E-02 | ADSS1, GOT1                                                                           |
| Chondroitin Sulfate Biosynthesis                         | 3h           | 2.46E-01      | 1.49E-02 | CHSY1                                                                                 |
| Chondroitin Sulfate Biosynthesis                         | 6h           | 2E-01         | 1.49E-02 | DSE                                                                                   |
| Cysteine Metabolism                                      | 3h           | 2.4E-01       | 1.11E-02 | LDHA                                                                                  |
| Cysteine Metabolism                                      | 12h          | 7.33E-01      | 2.22E-02 | GOT1, LDHA                                                                            |
| Fatty Acid Metabolism                                    | 3h           | 2.28E-01      | 1.04E-02 | ALDH3A2, ACSL1                                                                        |
| Fatty Acid Metabolism                                    | 6h           | 3.77E-01      | 1.56E-02 | ALDH3A2, PTGR1, ACSL1                                                                 |
| β-alanine Metabolism                                     | 3h           | 2.17E-01      | 1.02E-02 | ALDH3A2                                                                               |
| Arachidonic Acid Metabolism                              | 6h           | 8.88E-01      | 2.2E-02  | PLA2G4A, PTGES, PTGES3 (includes EG:10728), PTGS1, PTGS2                              |
| Arachidonic Acid Metabolism                              | 12h          | 1.24E00       | 2.2E-02  | PLA2G4A, PTGES, PTGS1, HPGDS, PTGS2                                                   |
| Linoleic Acid Metabolism                                 | 6h           | 2.86E-01      | 1.61E-02 | PLA2G4A, FADS1                                                                        |
| Linoleic Acid Metabolism                                 | 12h          | 4.1E-01       | 1.61E-02 | PLA2G4A, FADS1                                                                        |
| Sphingolipid Metabolism                                  | 6h           | 1.07E00       | 3.57E-02 | GLA, PPAP2B, SGPP1, SULF2                                                             |
| Oxidative Phosphorylation                                | 6h           | 2.77E-01      | 1.8E-02  | ATP6V1E1, ATP6V1H, ATP6V1C1                                                           |
| Purine Metabolism                                        | 6h           | 5.14E-01      | 1.82E-02 | PKM2, RP2, ENTPD1, ABCC1, ATF7IP, AK3L1, CASK, ATP13A2                                |
| Purine Metabolism                                        | 12h          | 4.25E-01      | 1.37E-02 | ADSS1, ENTPD1, PDE3B, ABCC1, PDE1B, IFNAR1                                            |
| Purine Metabolism                                        | 24h          | 2.98E-01      | 2.28E-03 | ENTPD1                                                                                |
| Pyrimidine Metabolism                                    | 6h           | 1.03E00       | 2.6E-02  | RP2, ENTPD1, EHD4, AK3L1, TXN, TXNRP1                                                 |
| Pyrimidine Metabolism                                    | 24h          | 5.39E-01      | 4.33E-03 | ENTPD1                                                                                |
| Nucleotide Sugars Metabolism                             | 6h           | 5.65E-01      | 1.35E-02 | UGDH                                                                                  |
| Nucleotide Sugars Metabolism                             | 12h          | 6.61E-01      | 1.35E-02 | UGDH                                                                                  |
| Metabolism of Xenobiotics by Cytochrome P450             | 6h           | 2.53E-01      | 9.57E-03 | GSTM5, PTGR1                                                                          |
| Metabolism of Xenobiotics by Cytochrome P450             | 12h          | 3.71E-01      | 9.57E-03 | GSTM5, HPGDS                                                                          |
| Metabolism of Xenobiotics by Cytochrome P450             | 24h          | 7.35E-01      | 4.78E-03 | GSTM5                                                                                 |
| Methane Metabolism                                       | 6h           | 5.4E-01       | 1.52E-02 | PRDX1                                                                                 |
| Methane Metabolism                                       | 12h          | 6.35E-01      | 1.52E-02 | CAT                                                                                   |
| Riboflavin Metabolism                                    | 6h           | 9.99E-01      | 3.64E-02 | ACP5, SGPP1                                                                           |
| C21-Steroid Hormone Metabolism                           | 12h          | 5.28E-01      | 1.41E-02 | EBP                                                                                   |
| Pentose and Glucuronate Interconversions                 | 6h           | 8.39E-01      | 1.32E-02 | UGDH, AKR1B10                                                                         |
| Pentose and Glucuronate Interconversions                 | 12h          | 3.87E-01      | 6.62E-03 | UGDH                                                                                  |
| Stilbene, Coumarine and Lignin Biosynthesis              | 6h           | 4.06E-01      | 1.2      |                                                                                       |
