# Supplementary material for: Transcriptomic Signature of Leishmania Infected Mice Macrophages: A Metabolic Point of View
Source: PubMed Central journal article supplement (PMC3424254; doi:10.1371/journal.pntd.0001763), 2012-08-21
Supplement: pntd.0001763.s002.pdf [file pntd.0001763.s002.pdf]

Table S2 : Selected genes up- or down-regulated more than two-fold in Leishmania infected BMdM as measured by array data

| Ensembl.Gene.ID    | Description                                                                                        | MGI Symbol | Pathways                  | Log2(FC)-1h        | Log2 (Fc)-3h | Log2 (Fc)-6h | Log2 (Fc)-12h | Log2 (Fc)-24h |             |
|--------------------|----------------------------------------------------------------------------------------------------|------------|---------------------------|--------------------|--------------|--------------|---------------|---------------|-------------|
| ENSMUSG00000028645 | Solute carrier family 2, facilitated glucose transporter member 1 (Glucose transporter type 1, €   | Slc2a1     | Glycolysis, pathway       | 0                  | 3,214378018  | 2,42716028   | 2,581617141   | 0             |             |
| ENSMUSG00000036427 | Glucose-6-phosphate isomerase (EC 5.3.1.9) (GPI) (Phosphoglucose isomerase) (PGI) (Phospho         | Gpi1       |                           | 0                  | 0            | 0            | 1,337895056   | 0             |             |
| ENSMUSG00000020277 | 6-phosphofructokinase, liver type (EC 2.7.1.11) (Phosphofructokinase 1) (Phosphohexokinase)        | Pfkl       |                           | 0                  | 1,214591183  | 0,95199684   | 0,766093313   | 0             |             |
| ENSMUSG00000021196 | 6-phosphofructokinase type C (EC 2.7.1.11) (Phosphofructokinase 1) (Phosphohexokinase) (Ph         | Pfkp       |                           | 0                  | 1,33842839   | 1,77882142   | 1,718663934   | 0             |             |
| ENSMUSG00000030695 | aldolase 1, A isoform, retrogene 1 [Source:MGI;Acc:MGI:2447811]                                    | Aldoa      |                           | 0                  | 0            | 0,81391449   | 0,920161      | 0             |             |
| ENSMUSG00000017390 | Fructose-bisphosphate aldolase C (EC 4.1.2.13) (Brain-type aldolase) (Aldolase 3) (Zebrin II) (Sc  | Aldoc      |                           | 0                  | 0            | 0            | 0,791231297   | 0             |             |
| ENSMUSG00000023456 | Triosephosphate isomerase (EC 5.3.1.1) (TIM) (Triose-phosphate isomerase). [Source:Uniprot/        | Tpi1       |                           | 0                  | 0            | 1,85248647   | 1,698747114   | 0             |             |
| ENSMUSG00000004267 | Gamma-enolase (EC 4.2.1.11) (2-phospho-D-glycerate hydro-lyase) (Neural enolase) (Neuron-s         | Eno2       |                           | 0                  | 1,68801578   | 1,68675772   | 1,719062067   | 1,36955953    |             |
| ENSMUSG00000032294 | Pyruvate kinase isozymes M1/M2 (EC 2.7.1.40) (Pyruvate kinase muscle isozyme). [Source:Uni         | Pkm2       |                           | 0                  | 0            | 1,05244608   | 0             | 0             |             |
| ENSMUSG00000057666 | Glyceraldehyde-3-phosphate dehydrogenase (EC 1.2.1.12) (GAPDH). [Source:Uniprot/SWISSPR            | Gapdh      |                           | 0                  | 0            | 0            | 0,926         | 0             |             |
| ENSMUSG00000026773 | 6-phosphofructo-2-kinase/fructose-2,6-biphosphatase 3 [Source:RefSeq_peptide;Acc:NP_5734           | Pfkfb3     |                           | 0                  | 1,530869524  | 0,9722233    | 1,349865181   | 0             |             |
| ENSMUSG00000006494 | Pyruvate dehydrogenase [lipoamide] kinase isozyme 1, mitochondrial precursor (EC 2.7.11.2)         | Pdk1       |                           | 0                  | 0,712072524  | 0,75918556   | 0             | 0             |             |
| ENSMUSG00000022707 | 1,4-alpha-glucan-branching enzyme (EC 2.4.1.18) (Glycogen-branching enzyme) (Brancher enzy         | Gbe1       |                           | starch degradation | 0            | 1,208213876  | 2,03964157    | 2,218365553   | 1,133666409 |
| ENSMUSG00000025791 | Phosphoglucomutase-1 (EC 5.4.2.2) (Glucose phosphomutase 1) (PGM 1). [Source:Uniprot/SW            | Pgm2       |                           |                    | 0            | 1,514197843  | 1,86392124    | 1,697257073   | 0           |
| ENSMUSG00000041731 | Phosphoglucomutase-like protein 5. [Source:Uniprot/SWISSPROT;Acc:Q8BZF8]                           | Pgm5       | 0                         |                    | 0            | 0            | 0,735801575   | 0             |             |
| ENSMUSG00000037012 | Hexokinase-1 (EC 2.7.1.1) (Hexokinase type I) (HK I) (Hexokinase, tumor isozyme). [Source:Uni      | Hk1        | 0                         |                    | 1,206750136  | 1,12417842   | 1,277000206   | 0             |             |
| ENSMUSG00000000628 | Hexokinase-2 (EC 2.7.1.1) (Hexokinase type II) (HK II). [Source:Uniprot/SWISSPROT;Acc:O0852        | Hk2        | 0                         |                    | 1,744413367  | 1,15000422   | 1,354032687   | 0             |             |
| ENSMUSG00000025877 | Hexokinase-3 (EC 2.7.1.1) (Hexokinase type III) (HK III). [Source:Uniprot/SWISSPROT;Acc:Q3TR       | Hk3        | 0                         |                    | 0,837699659  | 1,22313912   | 1,147896779   | 0,955257357   |             |
| ENSMUSG00000028961 | 6-phosphogluconate dehydrogenase, decarboxylating (EC 1.1.1.44). [Source:Uniprot/SWISSPR           | Pgd        | pentose phosphate Pathway | 0                  | 0            | 0,75903434   | 0             | 0             |             |
| ENSMUSG00000063229 | L-lactate dehydrogenase A chain (EC 1.1.1.27) (LDH-A) (LDH muscle subunit) (LDH-M). [Source:       | Ldha       |                           | 0                  | 1,12922393   | 1,89818424   | 1,522267929   | 0             |             |
| ENSMUSG00000025950 | Isocitrate dehydrogenase [NADP] cytoplasmic (EC 1.1.1.42) (Cytosolic NADP-isocitrate dehydr        | Idh1       | TCA Cycle                 | 0                  | -1,23202837  | -1,09653743  | -0,858694783  | 0             |             |
| ENSMUSG00000009863 | Succinate dehydrogenase [ubiquinone] iron-sulfur subunit, mitochondrial precursor (EC 1.3.5.1      | Sdhb       | TCA Cycle                 | 0                  | 0            | 0            | -1,057        | 0             |             |
| ENSMUSG00000026526 | Fumarate hydratase, mitochondrial precursor (EC 4.2.1.2) (Fumarase) (EF-3). [Source:Uniprot/       | Fh1        | TCA Cycle                 | 0                  | 0            | 0            | -0,882        | 0             |             |
| ENSMUSG00000035493 | Transforming growth factor-beta-induced protein ig-h3 precursor (Beta ig-h3). [Source:Uniprot      | Tgfb1      | Immune Response           | 0                  | 0            | -1,74969764  | 0             | 0             |             |
| ENSMUSG00000026875 | TNF receptor-associated factor 1. [Source:Uniprot/SWISSPROT;Acc:P39428]                            | Traf1      |                           | 0                  | 0,951411887  | 0            | 0             | 0             |             |
| ENSMUSG00000023034 | Nuclear receptor subfamily 4 group A member 1 (Orphan nuclear receptor HMR) (Nuclear horr          | Nr4a1      |                           | 2,33564923         | 0            | 0            | 0             | 0             |             |
| ENSMUSG00000027398 | Interleukin-1 beta precursor (IL-1 beta). [Source:Uniprot/SWISSPROT;Acc:P10749]                    | Il1b       |                           | 0                  | 0            | 0            | -1,315575005  | 0             |             |
| ENSMUSG00000033538 | Caspase-4 precursor (EC 3.4.22.64) (CASP-4) (Caspase-11) (CASP-11) (ICH-3 protease) [Contains      | Casp4      |                           | 0                  | 0,807970063  | 0            | 0             | 0             |             |
| ENSMUSG00000026981 | Interleukin-1 receptor antagonist protein precursor (IL-1ra) (IL-1RN) (IRAP) (IL1 inhibitor). [Sou | Il1rn      |                           | 0,94576245         | 1,650216475  | 1,91535962   | 1,421687394   | 0             |             |
| ENSMUSG00000027947 | Interleukin-6 receptor alpha chain precursor (IL-6R-alpha) (IL-6R 1) (CD126 antigen). [Source:U    | Il6ra      |                           | 0                  | -0,92323117  | -1,14923195  | -0,90027878   | 0             |             |
| ENSMUSG00000003882 | Interleukin-7 receptor alpha chain precursor (IL-7R-alpha) (CD127 antigen). [Source:Uniprot/S      | Il7r       |                           | 0                  | 0,804657399  | 0,93890821   | 0,749063556   | 0             |             |
| ENSMUSG00000024401 | Tumor necrosis factor precursor (TNF-alpha) (Tumor necrosis factor ligand superfamily membe        | Tnf        |                           | 1,89763288         | 2,029073699  | 1,38263071   | 0             | 0             |             |
| ENSMUSG00000037405 | Intercellular adhesion molecule 1 precursor (ICAM-1) (CD54 antigen) (MALA-2) (MyD10). [Sour        | Icam1      |                           | 0                  | 0,850306944  | 0            | 0             | 0             |             |
| ENSMUSG00000017652 | Tumor necrosis factor receptor superfamily member 5 precursor (CD40L receptor) (B-cell surfa       | Cd40       | 0                         | 0                  | 0,94646175   | 0            | 0             |               |             |
| ENSMUSG00000015396 | CD83 antigen [Source:RefSeq_peptide;Acc:NP_033986]                                                 | Cd83       | 1,19204799                | 0,84842764         | 0            | 0            | 0             |               |             |
| ENSMUSG00000022901 | T-lymphocyte activation antigen CD86 precursor (Activation B7-2 antigen) (Early T-cell costimu     | Cd86       | 0                         | 0,77526108         | 0,83923271   | 0            | 0             |               |             |
| ENSMUSG00000029380 | Growth-regulated alpha protein precursor (C-X-C motif chemokine 1) (Platelet-derived growth        | Cxcl1      | Chemokine                 | 1,54617355         | 1,098612242  | 0            | 0             | 0             |             |
| ENSMUSG00000034855 | C-X-C motif chemokine 10 precursor (Small-inducible cytokine B10) (Interferon-gamma-induce         | Cxcl10     |                           | 0                  | 0            | 1,19570684   | 1,424173848   | 0             |             |
| ENSMUSG00000058427 | Macrophage inflammatory protein 2 precursor (MIP2) (C-X-C motif chemokine 2). [Source:Uni          | Cxcl2      |                           | 3,25492812         | 2,101488006  | 2,33549267   | 0             | 0             |             |
| ENSMUSG00000029379 | chemokine (C-X-C motif) ligand 3 [Source:RefSeq_peptide;Acc:NP_976065]                             | Cxcl3      |                           | 0                  | 0,938993391  | 1,18692352   | 0             | 0             |             |

|                     |                                                                                                                                         |              |            |             |             |              |             |
|---------------------|-----------------------------------------------------------------------------------------------------------------------------------------|--------------|------------|-------------|-------------|--------------|-------------|
| ENSMUSG00000035385  | C-C motif chemokine 2 precursor (Small-inducible cytokine A2) (Monocyte chemotactic protein 2)                                          | Ccl2         | 1,70111436 | 0           | 0           | 0            | 0           |
| ENSMUSG0000000982   | C-C motif chemokine 3 precursor (Small-inducible cytokine A3) (Macrophage inflammatory protein 3)                                       | Ccl3         | 2,76824059 | 2,035651322 | 1,22715547  | 0            | 0           |
| ENSMUSG00000018930  | C-C motif chemokine 4 precursor (Small-inducible cytokine A4) (Macrophage inflammatory protein 4)                                       | Ccl4         | 2,28303004 | 0           | 1,05861235  | 0            | 0           |
| ENSMUSG00000049103  | C-C chemokine receptor type 2 (C-C CKR-2) (CC-CKR-2) (CCR-2) (CCR2) (JE/FIC receptor) (MCP-1 receptor)                                  | Ccr2         | 0          | -1,6640744  | -1,03161793 | 0            | 0           |
| ENSMUSG00000043953  | C-C chemokine receptor-like 2 (Lipopolysaccharide-inducible C-C chemokine receptor) (L-CCR) (L-CCR2)                                    | Ccr12        | 2,12433766 | 2,128908878 | 1,96990509  | 0            | 0           |
| ENSMUSG00000020826  | Nitric oxide synthase, inducible (EC 1.14.13.39) (NOS type II) (Inducible NO synthase) (Inducible nitric oxide synthase)                | Nos2         | 0          | 0           | 2,04860145  | 2,403772761  | 0           |
| ENSMUSG00000019987  | Arginase-1 (EC 3.5.3.1) (Type I arginase) (Liver-type arginase), [Source:Uniprot/SWISSPROT;Acc:Q9JLW1]                                  | Arg1         | 0          | 0           | 2,037       | 1,575        | 1,658       |
| ENSMUSG00000049723  | Macrophage metalloelastase precursor (EC 3.4.24.65) (MME) (Matrix metalloproteinase-12) (MMP-12), [Source:Uniprot/SWISSPROT;Acc:Q9JLW1] | Mmp12        | 0          | 0           | 1,602       | 1,724        | 1,03        |
| ENSMUSG00000000957  | Matrix metalloproteinase-14 precursor (EC 3.4.24.80) (MMP-14) (Membrane-type matrix metalloproteinase-14)                               | Mmp14        | 0          | 0,809       | 0           | 0            | 0           |
| ENSMUSG00000029084  | ADP-ribosyl cyclase 1 (EC 3.2.2.5) (Cyclic ADP-ribose hydrolase 1) (cADPr hydrolase 1) (NIM-R5 antigen) (NIM-R5)                        | Cd38         | 0          | 0           | 0,832       | 0,74         | 0           |
| ENSMUSG00000000555  | Integrin alpha-5 precursor (Fibronectin receptor subunit alpha) (Integrin alpha-F) (VLA-5) (CD49e antigen) (CD49e)                      | Itga5        | 0          | 0,924094724 | 0,720036034 | 0,825394513  | 0           |
| ENSMUSG000000037405 | Intercellular adhesion molecule 1 precursor (ICAM-1) (CD54 antigen) (MALA-2) (MyD10), [Source:Uniprot/SWISSPROT;Acc:Q9JLW1]             | Icam1        | 0          | 0,931       | 0           | 0            | 0           |
| ENSMUSG00000021670  | 3-hydroxy-3-methylglutaryl-coenzyme A reductase (EC 1.1.1.34) (HMG-CoA reductase), [Source:Uniprot/SWISSPROT;Acc:Q9JLW1]                | Hmgcr        | 0          | 0,766       | 0           | 0            | 0           |
| ENSMUSG00000022351  | Squalene monooxygenase (EC 1.14.99.7) (Squalene epoxidase) (SE), [Source:Uniprot/SWISSPROT;Acc:Q9JLW1]                                  | Sqle         | 0          | 0,810897603 | 0           | 0            | 0           |
| ENSMUSG00000026170  | Cytochrome P450 27, mitochondrial precursor (EC 1.14.13.15) (Cytochrome P-450C27/25) (Stearyl-CoA oxidase)                              | Cyp27a1      | 0          | -0,7250079  | -1,44239693 | -1,272885117 | 0           |
| ENSMUSG00000015243  | ATP-binding cassette sub-family A member 1 (ATP-binding cassette transporter 1) (ATP-binding cassette transporter 1)                    | Abca1        | 0          | 0           | -0,93577279 | 0            | 0           |
| ENSMUSG00000025203  | Acyl-CoA desaturase 2 (EC 1.14.19.1) (Stearoyl-CoA desaturase 2) (Fatty acid desaturase 2) (Desaturase 2)                               | Scd2         | 0          | 0           | 0           | 1,521323372  | 1,515090128 |
| ENSMUSG00000002944  | Platelet glycoprotein 4 (Platelet glycoprotein IV) (GPIV) (GPIIIB) (CD36 antigen) (PAS IV) (PAS-4)                                      | Cd36         | 0          | 0           | 1,33190094  | 0            | 0           |
| ENSMUSG00000007655  | Caveolin-1, [Source:Uniprot/SWISSPROT;Acc:P49817]                                                                                       | Cav1         | 0          | 0           | 0           | 0,745881736  | 0           |
| ENSMUSG00000022305  | Low-density lipoprotein receptor-related protein 12 precursor, [Source:Uniprot/SWISSPROT;Acc:Q9JLW1]                                    | Lrp12        | 0          | 1,043802329 | 0           | 0            | 0           |
| ENSMUSG00000076435  | Acyl-CoA synthetase family member 2, mitochondrial precursor (EC 6.2.1.-), [Source:Uniprot/SWISSPROT;Acc:Q9JLW1]                        | Acsf2        | 0          | 0           | -0,72716511 | 0            | 0           |
| ENSMUSG00000018796  | Long-chain-fatty-acid--CoA ligase 1 (EC 6.2.1.3) (Long-chain acyl-CoA synthetase 1) (LACS 1), [Source:Uniprot/SWISSPROT;Acc:Q9JLW1]     | Acs11        | 0          | 1,305541141 | 1,1225562   | 1,286080999  | 0           |
| ENSMUSG00000062515  | Fatty acid-binding protein, adipocyte (AFABP) (Adipocyte lipid-binding protein) (ALBP) (A-FABP)                                         | Fabp4        | 0          | 1,478791089 | 1,68120804  | 0            | 0           |
| ENSMUSG00000015568  | Lipoprotein lipase precursor (EC 3.1.1.34) (LPL), [Source:Uniprot/SWISSPROT;Acc:P11152]                                                 | Lpl          | 0          | 0           | 0           | 0            | 0,794       |
| ENSMUSG00000029314  | 1-acyl-sn-glycerol-3-phosphate acyltransferase theta (EC 2.3.1.51) (Lysophosphatidic acid acyltransferase)                              | Agpat9       | 0          | 0,724642752 | 0,71502502  | 0            | 0           |
| ENSMUSG00000028517  | Lipid phosphate phosphohydrolase 3 (EC 3.1.3.4) (Phosphatidic acid phosphatase 2b) (Phosphatidate phosphatase)                          | Ppap2b       | 0          | 1,052284718 | 1,26225361  | 1,112020775  | 0           |
| ENSMUSG00000030747  | Diacylglycerol O-acyltransferase 2 (EC 2.3.1.20) (Diglyceride acyltransferase 2), [Source:Uniprot/SWISSPROT;Acc:Q9JLW1]                 | Dgat2        | 0          | 0,845       | 0           | 0            | 0           |
| ENSMUSG00000031467  | 1-acyl-sn-glycerol-3-phosphate acyltransferase epsilon (EC 2.3.1.51) (1-AGP acyltransferase 5)                                          | Agpat5       | 0          | 0,802476155 | 0           | 0            | 0           |
| ENSMUSG00000056220  | Cytosolic phospholipase A2 (cPLA2) (Phospholipase A2 group IVA) [Includes: Phospholipase A2 group IVA]                                  | Pla2g4a      | 0          | 0           | 0,7902618   | 0,717374986  | 0           |
| ENSMUSG00000028378  | NADP-dependent leukotriene B4 12-hydroxydehydrogenase (EC 1.3.1.74) (15-oxoprostaglandin synthase)                                      | Ltb4dh       | 0          | 0           | 1,21089194  | 0            | 0           |
| ENSMUSG00000029919  | Glutathione-requiring prostaglandin D synthase (EC 5.3.99.2) (Glutathione-dependent PGD synthase)                                       | Ptgds2       | 0          | 0           | 0           | -0,806259096 | 0           |
| ENSMUSG00000039942  | Prostaglandin E2 receptor EP4 subtype (Prostanoid EP4 receptor) (PGE receptor, EP4 subtype)                                             | Ptger4       | 0,82848723 | 0           | 0           | 0            | 0           |
| ENSMUSG00000050737  | Prostaglandin E synthase (EC 5.3.99.3) (mPGES-1), [Source:Uniprot/SWISSPROT;Acc:Q9JLW1]                                                 | Ptges        | 0          | 1,318719911 | 1,78705281  | 1,599546431  | 0           |
| ENSMUSG00000071072  | Prostaglandin E synthase 3 (EC 5.3.99.3) (Cytosolic prostaglandin E2 synthase) (cPGES) (Telomerase)                                     | Ptges3       | 0          | 0           | 0,93676353  | 0            | 0           |
| ENSMUSG00000047250  | Prostaglandin G/H synthase 1 precursor (EC 1.14.99.1) (Cyclooxygenase- 1) (COX-1) (Prostaglandin synthase)                              | Ptgs1 (cox1) | 0          | 0           | -1,31384103 | -1,279805241 | 0           |
| ENSMUSG00000032487  | Prostaglandin G/H synthase 2 precursor (EC 1.14.99.1) (Cyclooxygenase- 2) (COX-2) (Prostaglandin synthase)                              | Ptgs2 (cox2) | 1,95483853 | 2,240586175 | 1,78799857  | 2,459334673  | 0           |
| ENSMUSG00000016427  | NADH dehydrogenase [ubiquinone] 1 alpha subcomplex subunit 1 (NADH- ubiquinone oxidoreductase)                                          | Ndufa1       | 0          | 0           | 0,977       | -0,863       | 0           |
| ENSMUSG00000014294  | NADH dehydrogenase [ubiquinone] 1 alpha subcomplex subunit 2 (NADH- ubiquinone oxidoreductase)                                          | Ndufa2       | 0          | 0           | 0,917       | -0,892       | 0           |
| ENSMUSG00000023089  | NADH dehydrogenase [ubiquinone] 1 alpha subcomplex subunit 5 (NADH- ubiquinone oxidoreductase)                                          | Ndufa5       | 0          | 0           | 0           | -0,954       | 0           |
| ENSMUSG00000026895  | NADH dehydrogenase [ubiquinone] 1 alpha subcomplex subunit 8 (NADH- ubiquinone oxidoreductase)                                          | Ndufa8       | 0          | 0           | 0           | -0,745       | 0           |
| ENSMUSG00000040048  | NADH dehydrogenase [ubiquinone] 1 beta subcomplex subunit 10 (NADH- ubiquinone oxidoreductase)                                          | Ndufb10      | 0          | 0           | 0           | -0,816       | 0           |
| ENSMUSG00000031059  | NADH dehydrogenase [ubiquinone] 1 beta subcomplex subunit 11, mitochondrial precursor (NADH- ubiquinone oxidoreductase)                 | Ndufb11      | 0          | 0           | 0           | -0,928       | 0           |

Adhesion molecules

Cholesterol pathway

Triglyceride pathway

Prostaglandine synthesis

Complex I structure

|                    |                                                                                               |         |                               |   |   |       |        |   |
|--------------------|-----------------------------------------------------------------------------------------------|---------|-------------------------------|---|---|-------|--------|---|
| ENSMUSG0000002416  | NADH dehydrogenase [ubiquinone] 1 beta subcomplex subunit 2, mitochondrial precursor (NA      | Ndufb2  |                               | 0 | 0 | 0     | -0,864 | 0 |
| ENSMUSG00000025204 | NADH dehydrogenase [ubiquinone] 1 beta subcomplex subunit 8, mitochondrial precursor (NA      | Ndufb8  |                               | 0 | 0 | 0     | -0,887 | 0 |
| ENSMUSG00000030647 | NADH dehydrogenase [ubiquinone] 1 subunit C2 (NADH-ubiquinone oxidoreductase subunit B        | Ndufc2  |                               | 0 | 0 | 0     | -1,114 | 0 |
| ENSMUSG00000009863 | Succinate dehydrogenase [ubiquinone] iron-sulfur subunit, mitochondrial precursor (EC 1.3.5.1 | Sdhb    | Complex II activity + Sdhb (T | 0 | 0 | 0     | -1,057 | 0 |
| ENSMUSG00000059534 | Cytochrome b-c1 complex subunit 9 (Ubiquinol-cytochrome c reductase complex 7.2 kDa prote     | Uqcr10  | Complex III-May function as   | 0 | 0 | 0,834 | -0,897 | 0 |
| ENSMUSG00000038462 | Cytochrome b-c1 complex subunit Rieske, mitochondrial precursor (EC 1.10.2.2) (Ubiquinol-cy   | Uqcrfs1 | Complex III-Nuclear subunit-  | 0 | 0 | 0     | -0,965 | 0 |
| ENSMUSG00000063882 | Cytochrome b-c1 complex subunit 6, mitochondrial precursor (Ubiquinol- cytochrome c reduct    | Uqcrh   | Complex III-UQCRH (Subunit    | 0 | 0 | 0,772 | 0      | 0 |
| ENSMUSG00000046516 | Cytochrome c oxidase copper chaperone. [Source:Uniprot/SWISSPROT;Acc:P56394]                  | Cox17   | Complex IV                    | 0 | 0 | 0,893 | 0      | 0 |
| ENSMUSG00000000088 | Cytochrome c oxidase subunit 5A, mitochondrial precursor (Cytochrome c oxidase polypeptide    | Cox5a   |                               | 0 | 0 | 0,793 | -1,119 | 0 |
| ENSMUSG00000041697 | Cytochrome c oxidase polypeptide VIa-liver, mitochondrial precursor. [Source:Uniprot/SWISSP   | Cox6a1  |                               | 0 | 0 | 0     | -1,24  | 0 |
| ENSMUSG00000036751 | Cytochrome c oxidase subunit VIb isoform 1 (COX VIb-1). [Source:Uniprot/SWISSPROT;Acc:P56     | Cox6b1  |                               | 0 | 0 | 0,818 | -1,098 | 0 |
| ENSMUSG00000031818 | Cytochrome c oxidase subunit 4 isoform 1, mitochondrial precursor (Cytochrome c oxidase sub   | Cox4i1  |                               | 0 | 0 | 0,834 | -1,27  | 0 |
| ENSMUSG00000024248 | Cytochrome c oxidase subunit VIIa-related protein, mitochondrial precursor (Silica-induced ge | Cox7a2l |                               | 0 | 0 | 0     | -1,565 | 0 |
| ENSMUSG00000016252 | ATP synthase subunit epsilon, mitochondrial. [Source:Uniprot/SWISSPROT;Acc:P56382]            | Atp5e   | Peripheral moiety: F1 /Nucl   | 0 | 0 | 0     | -1,298 | 0 |
| ENSMUSG00000018770 | ATP synthase lipid-binding protein, mitochondrial precursor (ATP synthase proteolipid P3) (AT | Atp5g3  | Integral membrane compon      | 0 | 0 | 1,142 | -1,261 | 0 |
