# Supplementary material for: Transcriptomic Signature of Leishmania Infected Mice Macrophages: A Metabolic Point of View
Source: PLoS Negl Trop Dis. 2012 Aug 21;6(8):e1763. doi: 10.1371/journal.pntd.0001763 (PMC3424254; doi:10.1371/journal.pntd.0001763)
Supplement: Table S3 — Selected genes up- or down-regulated more than two-fold in Leishmania infected BMdM as measured by qRT-PCR. Genes selected in Table S2 were tested by qRT-PCR. Changes in mRNA levels are calculated using the 2−ΔΔCT method. The numbers presented for each time point are the average of the three biological replicates. (PDF) [file pntd.0001763.s003.pdf]

Table S3 : selected genes up- or down-regulated more than two-fold in Leishmania infected BMdM as confirmed by qPCR

| Ensembl.Gene.ID    | Description                                           | MGI Symbol | Pathways                  | 2-DDCt (1h) | 2-DDCt (3h) | 2-DDCt (6h) | 2-DDCt (12h) | 2-DDCt (24h) |
|--------------------|-------------------------------------------------------|------------|---------------------------|-------------|-------------|-------------|--------------|--------------|
| ENSMUSG00000028645 | Solute carrier family 2, facilitated glucose transpor | Slc2a1     | Glycolysis pathway        | 1,045465171 | 6,2372064   | 5,4248597   | 2,33128034   | 1,94642713   |
| ENSMUSG00000036427 | Glucose-6-phosphate isomerase (EC 5.3.1.9) (GPI) (    | Gpi1       |                           | 0,952787682 | 1,21986655  | 1,7652153   | 1,50440621   | 1,78402603   |
| ENSMUSG00000020277 | 6-phosphofructokinase, liver type (EC 2.7.1.11) (Ph   | Pfkl       |                           | 0,864612391 | 2,03009185  | 2,7587704   | 0,97192372   | 1,04108835   |
| ENSMUSG00000021196 | 6-phosphofructokinase type C (EC 2.7.1.11) (Phosp     | Pfklp      |                           | 1,146454223 | 2,81047049  | 5,0384865   | 1,6289662    | 1,67585133   |
| ENSMUSG00000030695 | aldolase 1, A isoform, retrogene 1 [Source:MGI;Ac     | Aldoa      |                           | 0,895661449 | 1,27286846  | 2,4430026   | 1,08567829   | 2,14165956   |
| ENSMUSG00000017390 | Fructose-bisphosphate aldolase C (EC 4.1.2.13) (Br    | Aldoc      |                           | 2,175042739 | 2,50384166  | 0,8238444   | 3,87504125   | 2,09395315   |
| ENSMUSG00000023456 | Triosephosphate isomerase (EC 5.3.1.1) (TIM) (Trio    | Tpi1       |                           | 0,836861046 | 1,62932191  | 3,3771334   | 1,38504466   | 2,05509488   |
| ENSMUSG00000004267 | Gamma-enolase (EC 4.2.1.11) (2-phospho-D-glycer       | Eno2       |                           | 1,26746896  | 3,324122    | 3,1585602   | 1,33751493   | 1,94188016   |
| ENSMUSG00000032294 | Pyruvate kinase isozymes M1/M2 (EC 2.7.1.40) (Py      | Pkm2       |                           | 0,909676454 | 1,2957224   | 2,3225727   | 1,15663741   | 1,79762551   |
| ENSMUSG00000057666 | Glyceraldehyde-3-phosphate dehydrogenase (EC 1        | Gapdh      |                           | 0,964361136 | 1,24320424  | 2,3675563   | 1,26701769   | 1,97560451   |
| ENSMUSG00000026773 | 6-phosphofructo-2-kinase/fructose-2,6-biphospha       | Pfkfb3     | strach degradation        | 1,279124478 | 2,42577095  | 2,0562692   | 1,68223101   | 1,28495544   |
| ENSMUSG00000006494 | Pyruvate dehydrogenase [lipoamide]] kinase isozy      | Pdk1       |                           | 0,683282342 | 1,56646949  | 2,6069666   | 1,2655095    | 1,71797515   |
| ENSMUSG00000022707 | 1,4-alpha-glucan-branching enzyme (EC 2.4.1.18) (     | Gbe1       |                           | 0,861982459 | 1,8640945   | 8,6470044   | 2,15351743   | 2,05673487   |
| ENSMUSG00000025791 | Phosphoglucomutase-1 (EC 5.4.2.2) (Glucose phosj      | Pgm2       | pentose phosphate Pathway | 0,851560931 | 2,64930388  | 4,796967    | 1,88165765   | 1,83737572   |
| ENSMUSG00000037012 | Hexokinase-1 (EC 2.7.1.1) (Hexokinase type I) (HK I   | Hk1        |                           | 1,633415323 | 0,17199219  | 0,6965622   | 1,26921297   | 0,29806558   |
| ENSMUSG00000000628 | Hexokinase-2 (EC 2.7.1.1) (Hexokinase type II) (HK    | Hk2        |                           | 1,490569609 | 2,40349144  | 2,6472915   | 1,08483954   | 1,51731872   |
| ENSMUSG00000028961 | 6-phosphogluconate dehydrogenase, decarboxylat        | Pgd        |                           | 0,910371364 | 0,97108535  | 1,7111747   | 0,86234974   | 0,86167008   |
| ENSMUSG00000031299 | Apyruvate dehydrogenase E1 alpha 1                    | Pdha1      |                           | 0,944281395 | 0,95325229  | 0,9112573   | 0,69385206   | 1,23596895   |
| ENSMUSG00000063229 | L-lactate dehydrogenase A chain (EC 1.1.1.27) (LDH    | Ldha       |                           | 0,87189446  | 2,11647728  | 3,9838558   | 1,223898     | 1,96372671   |
| ENSMUSG00000024892 | pyruvate carboxylase                                  | Pcx        |                           | 0,786519806 | 0,99518272  | 1,938312    | 0,95148149   | 0,99347576   |
| ENSMUSG00000046934 | citrate synthase like                                 | Csl        |                           | 0,921782798 | 0,66293837  | 1,0483124   | 0,65477675   | 0,86390775   |
| ENSMUSG00000025950 | Isocitrate dehydrogenase [NADP] cytoplasmic (EC :     | Idh1       | TCA Cycle                 | 0,907770808 | 0,5196048   | 0,5301531   | 0,6496941    | 0,76087692   |
| ENSMUSG00000021577 | succinate dehydrogenase complex, subunit A, flavo     | Sdha       | TCA Cycle                 | 0,8638566   | 0,83795325  | 0,7296334   | 0,57782452   | 0,9180847    |
| ENSMUSG00000009863 | Succinate dehydrogenase [ubiquinone] iron-sulfur      | Sdhb       | TCA Cycle                 | 0,863756809 | 0,83719175  | 0,7720879   | 0,56190767   | 0,93364597   |
| ENSMUSG00000026526 | Fumarate hydratase, mitochondrial precursor (EC :     | Fh1        | TCA Cycle                 | 0,746804918 | 0,65581009  | 0,4407001   | 0,75230304   | 0,9015462    |
| ENSMUSG00000035493 | Transforming growth factor-beta-induced protein i     | Tgfb1      |                           | 1,021392002 | 0,54483137  | 0,7244949   | 1,10604813   | 0,73927942   |
| ENSMUSG00000023034 | Nuclear receptor subfamily 4 group A member 1 (C      | Nr4a1      |                           | 8,694782868 | 1,98167448  | 1,5079018   | 1,68482743   | 0,38218905   |
| ENSMUSG00000027398 | Interleukin-1 beta precursor (IL-1 beta). [Source:U   | Il1b       |                           | 2,002321078 | 0,97034409  | 0,8021001   | 0,7661148    | 0,17035289   |

|                    |                                                       |         |                     |             |             |            |             |             |
|--------------------|-------------------------------------------------------|---------|---------------------|-------------|-------------|------------|-------------|-------------|
| ENSMUSG00000026981 | Interleukin-1 receptor antagonist protein precursor   | Il1rn   | Immune Response     | 2,256296503 | 3,60939408  | 6,6618175  | 4,10228436  | 2,48251655  |
| ENSMUSG00000027947 | Interleukin-6 receptor alpha chain precursor (IL-6R)  | Il6ra   |                     | 0,84007983  | 0,43589876  | 0,4682554  | 0,73154364  | 0,69668416  |
| ENSMUSG00000003882 | Interleukin-7 receptor alpha chain precursor (IL-7R)  | Il7r    |                     | 0,897995684 | 1,65192898  | 1,6961657  | 1,03205749  | 1,23806967  |
| ENSMUSG00000024401 | Tumor necrosis factor precursor (TNF-alpha) (Tum)     | Tnf     |                     | 3,492362543 | 3,9715211   | 3,1793735  | 5,45256791  | 1,27157363  |
| ENSMUSG00000037405 | Intercellular adhesion molecule 1 precursor (ICAM)    | Icam1   |                     | 1,173991259 | 1,74824414  | 1,4671155  | 1,24674161  | 0,9493476   |
| ENSMUSG00000017652 | Tumor necrosis factor receptor superfamily memb       | Cd40    |                     | 1,538844104 | 2,94777212  | 5,7281082  | 3,18370501  | 0,33294386  |
| ENSMUSG00000015396 | CD83 antigen [Source:RefSeq_peptide;Acc:NP_033        | Cd83    | Chemokine           | 1,813877571 | 3,81571477  | 0,9129211  | 1,07480629  | 0,49828308  |
| ENSMUSG00000022901 | T-lymphocyte activation antigen CD86 precursor (/     | Cd86    |                     | 1,280158179 | 1,67136288  | 1,2409575  | 1,43351964  | 0,35752371  |
| ENSMUSG00000029380 | Growth-regulated alpha protein precursor (C-X-C n     | Cxcl1   |                     | 6,370862718 | 4,97805901  | 2,4932578  | 4,56614498  | 0,63834614  |
| ENSMUSG00000034855 | C-X-C motif chemokine 10 precursor (Small-inducib     | Cxcl10  |                     | 1,236915261 | 1,01702607  | 3,1058665  | 3,98197501  | 1,23422892  |
| ENSMUSG00000058427 | Macrophage inflammatory protein 2 precursor (MI       | Cxcl2   |                     | 6,766385701 | 5,36028608  | 2,3663231  | 3,94840506  | 0,5054134   |
| ENSMUSG00000029379 | chemokine (C-X-C motif) ligand 3 [Source:RefSeq_      | Cxcl3   |                     | 2,733631448 | 2,27156775  | 3,870072   | 2,33694428  | 0,89343468  |
| ENSMUSG00000035385 | C-C motif chemokine 2 precursor (Small-inducible)     | Ccl2    | Cholesterol pathway | 5,497783137 | 1,75884904  | 0,9529489  | 2,38298108  | 0,72422255  |
| ENSMUSG00000000982 | C-C motif chemokine 3 precursor (Small-inducible)     | Ccl3    |                     | 4,173247305 | 2,97367779  | 1,5566761  | 2,48272018  | 1,25607926  |
| ENSMUSG00000018930 | C-C motif chemokine 4 precursor (Small-inducible)     | Ccl4    |                     | 4,327464796 | 4,1754017   | 2,3753752  | 3,09121357  | 0,91452161  |
| ENSMUSG00000049103 | C-C chemokine receptor type 2 (C-C CKR-2) (CC-CKR)    | Ccr2    |                     | 0,94778304  | 0,40860016  | 0,5841687  | 0,67883209  | 0,65185553  |
| ENSMUSG00000043953 | C-C chemokine receptor-like 2 (Lipopolysaccharide-    | Ccr12   |                     | 2,132965183 | 4,31354299  | 2,6930427  | 1,50905808  | 0,77614198  |
| ENSMUSG00000020826 | Nitric oxide synthase, inducible (EC 1.14.13.39) (NO  | Nos2    |                     | 1,58014697  | 6,058350306 | 47,5176665 | 7,213036212 | 6,18884776  |
| ENSMUSG00000019987 | Arginase-1 (EC 3.5.3.1) (Type I arginase) (Liver-type | Arg1    |                     | 0,755111756 | 1,310101268 | 5,9167793  | 1,535726883 | 0,863264261 |
| ENSMUSG00000021670 | 3-hydroxy-3-methylglutaryl-coenzyme A reductase       | Hmgcr   |                     | 1,357089074 | 1,55569222  | 1,4248981  | 0,83228719  | 0,8671404   |
| ENSMUSG00000022351 | Squalene monooxygenase (EC 1.14.99.7) (Squalene       | Sqle    |                     | 1,329481544 | 2,5228714   | 3,1179413  | 1,45305737  | 1,4464193   |
| ENSMUSG00000026170 | Cytochrome P450 27, mitochondrial precursor (EC       | Cyp27a1 |                     | 0,846888141 | 0,66029304  | 0,1711296  | 0,44647279  | 0,46220881  |
| ENSMUSG00000015243 | ATP-binding cassette sub-family A member 1 (ATP-      | Abca1   |                     | 0,851528713 | 0,87721051  | 0,6734738  | 0,83446879  | 0,75744647  |
| ENSMUSG00000025203 | Acyl-CoA desaturase 2 (EC 1.14.19.1) (Stearoyl-CoA    | Scd2    |                     | 0,939264464 | 1,00803565  | 1,7796816  | 1,86733292  | 2,87151746  |
| ENSMUSG00000002944 | Platelet glycoprotein 4 (Platelet glycoprotein IV) (G | Cd36    |                     | 0,84873167  | 1,43561609  | 2,2866418  | 1,96686781  | 2,4853933   |
| ENSMUSG00000007655 | Caveolin-1. [Source:Uniprot/SWISSPROT;Acc:P498        | Cav1    |                     | 0,967616371 | 1,01872289  | 2,1620558  | 1,33890011  | 0,67451425  |
| ENSMUSG00000022305 | Low-density lipoprotein receptor-related protein 1    | Lrp12   |                     | 0,934865301 | 1,70524811  | 1,4245047  | 0,82500037  | 1,09362073  |
| ENSMUSG00000018796 | Long-chain-fatty-acid--CoA ligase 1 (EC 6.2.1.3) (Lo  | Acsl1   |                     | 1,12963661  | 2,15349753  | 3,6231773  | 1,43883717  | 1,39693591  |
| ENSMUSG00000062515 | Fatty acid-binding protein, adipocyte (AFABP) (Adi    | Fabp4   |                     | 1,21260142  | 2,20402156  | 1,9952904  | 1,21761525  | 1,21945301  |
| ENSMUSG00000015568 | Lipoprotein lipase precursor (EC 3.1.1.34) (LPL). [Sc | Lpl     |                     | 0,6334578   | 0,87081309  | 0,9258062  | 1,68456372  | 2,94850948  |
| ENSMUSG00000028517 | Lipid phosphate phosphohydrolase 3 (EC 3.1.3.4) (l    | Ppap2b  |                     | 1,161150519 | 4,35687382  | 7,4215173  | 2,22154367  | 2,34115156  |
| ENSMUSG00000030747 | Diacylglycerol O-acyltransferase 2 (EC 2.3.1.20) (Di  | Dgat2   |                     | 0,764091376 | 2,69966426  | 1,2700354  | 0,82693739  | 0,80381245  |

|                    |                                                               |              |                          |             |            |           |            |            |
|--------------------|---------------------------------------------------------------|--------------|--------------------------|-------------|------------|-----------|------------|------------|
| ENSMUSG00000031467 | 1-acyl-sn-glycerol-3-phosphate acyltransferase eps            | Agpat5       |                          | 0,902617768 | 2,19808676 | 1,8327929 | 0,96308386 | 1,02835793 |
| ENSMUSG00000056220 | Cytosolic phospholipase A2 (cPLA2) (Phospholipase A2)         | Pla2g4a      | Prostaglandine synthesis | 1,080155299 | 2,33603194 | 4,1006438 | 1,51134532 | 1,29621572 |
| ENSMUSG00000028378 | NADP-dependent leukotriene B4 12-hydroxydehydrogenase         | Ltb4dh       |                          | 0,917572038 | 1,45797232 | 3,7112559 | 1,7832729  | 1,56575303 |
| ENSMUSG00000029919 | Glutathione-requiring prostaglandin D synthase (EP4)          | Ptgds2       |                          | 0,864727265 | 1,53899833 | 0,640017  | 0,4710319  | 0,81495982 |
| ENSMUSG00000039942 | Prostaglandin E2 receptor EP4 subtype (Prostanoid 4)          | Ptger4       |                          | 2,277980531 | 1,18797406 | 0,7858262 | 1,07334956 | 1,02092072 |
| ENSMUSG00000050737 | Prostaglandin E synthase (EC 5.3.99.3) (mPGES-1)              | Ptges        |                          | 1,402295521 | 3,98403411 | 17,936259 | 3,63539804 | 2,75078967 |
| ENSMUSG00000071072 | Prostaglandin E synthase 3 (EC 5.3.99.3) (Cytosolic)          | Ptges3       |                          | 1,045249304 | 1,35860085 | 1,3767059 | 0,71889435 | 0,85888537 |
| ENSMUSG00000047250 | Prostaglandin G/H synthase 1 precursor (EC 1.14.99.3)         | Ptgs1 (cox1) |                          | 0,976846478 | 0,36452466 | 0,1209849 | 0,30995056 | 0,45007921 |
| ENSMUSG00000032487 | Prostaglandin G/H synthase 2 precursor (EC 1.14.99.3)         | Ptgs2 (cox2) |                          | 8,396377802 | 5,3499114  | 10,167681 | 4,93440113 | 1,89403873 |
| ENSMUSG00000014294 | NADH dehydrogenase [ubiquinone] 1 alpha subunit               | Ndufa2       | Complex I activity       | 1,018525488 | 0,94964816 | 1,0588308 | 0,75887456 | 1,01559545 |
| ENSMUSG00000030647 | NADH dehydrogenase [ubiquinone] 1 subunit C2 (I)              | Ndufc2       |                          | 1,245203972 | 0,85666814 | 1,0482071 | 0,64795851 | 0,89338308 |
| ENSMUSG00000021764 | NADH dehydrogenase [ubiquinone] iron-sulfur protein           | Ndufs4       |                          | 0,928156775 | 0,94779153 | 1,0479153 | 0,68223153 | 0,96510256 |
| ENSMUSG00000021577 | succinate dehydrogenase complex, subunit A, flavin            | Sdha         |                          | 0,8638566   | 0,83795325 | 0,7296334 | 0,57782452 | 0,9180847  |
| ENSMUSG00000009863 | Succinate dehydrogenase [ubiquinone] iron-sulfur              | Sdhb         |                          | 0,863756809 | 0,83719175 | 0,7720879 | 0,56190767 | 0,93364597 |
| ENSMUSG00000038462 | Cytochrome b-c1 complex subunit Rieske, mitochondrial         | Uqcrrs1      |                          | 1,122525914 | 1,27464898 | 0,5723146 | 0,6526667  | 1,01308075 |
| ENSMUSG00000063882 | Cytochrome b-c1 complex subunit 6, mitochondrial              | Uqcrrh       |                          | 0,911764883 | 0,98165864 | 0,9828867 | 0,79170599 | 1,02519321 |
| ENSMUSG00000046516 | Cytochrome c oxidase copper chaperone. [Source:UniProt]       | Cox17        | Complex IV               | 1,265625363 | 1,29685603 | 1,1890344 | 0,68976173 | 1,05083476 |
| ENSMUSG00000000088 | Cytochrome c oxidase subunit 5A, mitochondrial                | Cox5a        |                          | 1,01269314  | 1,08244721 | 0,8722833 | 0,62876377 | 0,87795922 |
| ENSMUSG00000036751 | Cytochrome c oxidase subunit VIb isoform 1 (COX VIb)          | Cox6b1       |                          | 0,926850356 | 0,98443419 | 0,8445419 | 0,77913083 | 0,98206698 |
| ENSMUSG00000031818 | Cytochrome c oxidase subunit 4 isoform 1, mitochondrial       | Cox4i1       |                          | 0,895161824 | 0,99824672 | 0,854801  | 0,65967317 | 0,96013832 |
| ENSMUSG00000024248 | Cytochrome c oxidase subunit VIIa-related protein             | Cox7a2l      |                          | 1,014769221 | 0,92969109 | 0,7199494 | 0,88301764 | 0,97024433 |
| ENSMUSG00000016252 | ATP synthase subunit epsilon, mitochondrial. [Source:UniProt] | Atp5e        |                          | 0,963568242 | 0,93618464 | 0,8721614 | 0,65444098 | 0,93261756 |
| ENSMUSG00000018770 | ATP synthase lipid-binding protein, mitochondrial             | Atp5g3       |                          | 0,995108276 | 1,12222607 | 1,0492841 | 0,67829354 | 0,893891   |
